# Supplementary material for: Total Flavonoids from Camellia oleifera Alleviated Mycoplasma pneumoniae-Induced Lung Injury via Inhibition of the TLR2-Mediated NF-κB and MAPK Pathways
Source: MDPI journal article supplement (doi:10.3390/molecules28207077), 2023-10-13
Supplement: s1 [file s1]

**Table S1.**  $^1\text{H}$  NMR (600 MHz) and  $^{13}\text{C}$  NMR (150 MHz) data for compounds **1** and **3** in  $\text{CD}_3\text{OD}$  ( $\delta$  in ppm,  $J$  in Hz)

| No.    | <b>1</b>                           |                     | <b>3</b>                         |                     |
|--------|------------------------------------|---------------------|----------------------------------|---------------------|
|        | $\delta_{\text{C}}$                | $\delta_{\text{H}}$ | $\delta_{\text{C}}$              | $\delta_{\text{H}}$ |
| 2      | 157.2                              |                     | 157.2                            |                     |
| 3      | 133.3                              |                     | 133.4                            |                     |
| 4      | 178.1                              |                     | 177.9                            |                     |
| 5      | 161.6                              |                     | 161.6                            |                     |
| 6      | 98.7                               | 6.18 d (1.8)        | 98.9                             | 6.16 s              |
| 7      | 165.1                              |                     | 165.7                            |                     |
| 8      | 93.7                               | 6.38 d (1.4)        | 93.7                             | 6.34 s              |
| 9      | 160.1                              |                     | 160.0                            |                     |
| 10     | 104.2                              |                     | 104.0                            |                     |
| 1'     | 121.5                              |                     | 121.6                            |                     |
| 2', 6' | 131.0                              | 8.02 d (8.8)        | 131.0                            | 8.05 d (8.8)        |
| 3', 5' | 114.8                              | 6.90 d (8.8)        | 114.8                            | 6.89 d (8.8)        |
| 4'     | 157.9                              |                     | 157.2                            |                     |
|        | $\beta\text{-D-Glucopyranose (A)}$ |                     | $\beta\text{-D-Glucopyranose}$   |                     |
| 1      | 99.8                               | 5.34 d (7.6)        | 99.5                             | 5.33 d (7.5)        |
| 2      | 80.6                               |                     | 80.5                             |                     |
| 3      | 76.9                               |                     | 76.8                             |                     |
| 4      | 70.7                               |                     | 70.7                             |                     |
| 5      | 76.4                               |                     | 75.6                             |                     |
| 6      | 66.9                               |                     | 66.7                             |                     |
|        | $\alpha\text{-L-Rhamnopyranose}$   |                     | $\alpha\text{-L-Rhamnopyranose}$ |                     |
| 1      | 100.8                              | 4.48 d (1.4)        | 100.8                            | 4.49 s              |
| 2      | 70.9                               |                     | 70.9                             |                     |
| 3      | 72.5                               |                     | 72.5                             |                     |
| 4      | 70.0                               |                     | 70.0                             |                     |
| 5      | 68.3                               |                     | 68.3                             |                     |
| 6      | 16.5                               | 1.09 d (6.2)        | 16.5                             | 1.09 d (6.2)        |
|        | $\beta\text{-D-Glucopyranose (B)}$ |                     | $\beta\text{-D-Xylopyranose}$    |                     |
| 1      | 103.1                              | 4.77 d (7.4)        | 103.8                            | 4.78 d (6.8)        |
| 2      | 74.0                               |                     | 73.3                             |                     |
| 3      | 75.5                               |                     | 75.5                             |                     |
| 4      | 69.9                               |                     | 69.6                             |                     |
| 5      | 76.5                               |                     | 65.2                             |                     |
| 6      | 61.2                               |                     |                                  |                     |

**Table S2.** Contents of TFCO and compounds **1-5** in *Camellia oleifera* seed.

|                   | Total Yield | % Yield (w/w) |
|-------------------|-------------|---------------|
| TFCO              | 28.40       | 0.57          |
| Compound <b>1</b> | 11.20       | 0.22          |
| Compound <b>2</b> | 1.07        | 0.02          |
| Compound <b>3</b> | 15.04       | 0.30          |
| Compound <b>4</b> | 0.37        | <0.01         |
| Compound <b>5</b> | 0.27        | <0.01         |

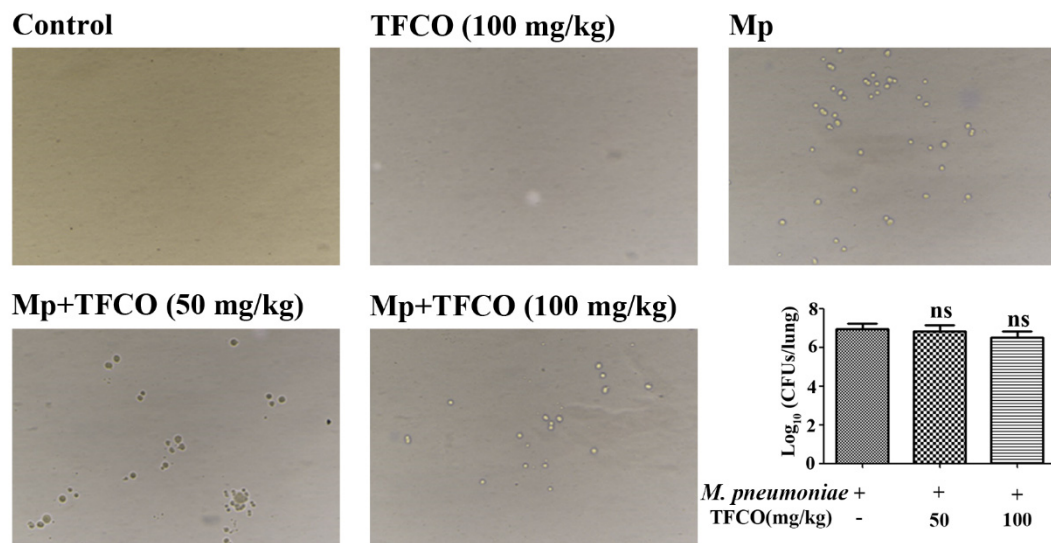

**Figure S1.** The load of *M. pneumoniae* in the lungs of infected mice. ns: non-significant differences versus *M. pneumoniae* group

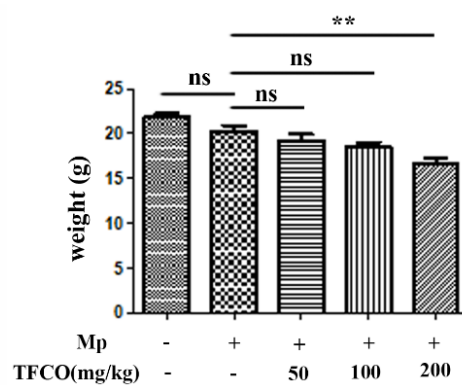

**Figure S2.** The weight of mice. ns: non-significant differences, \*\* $p < 0.01$ .

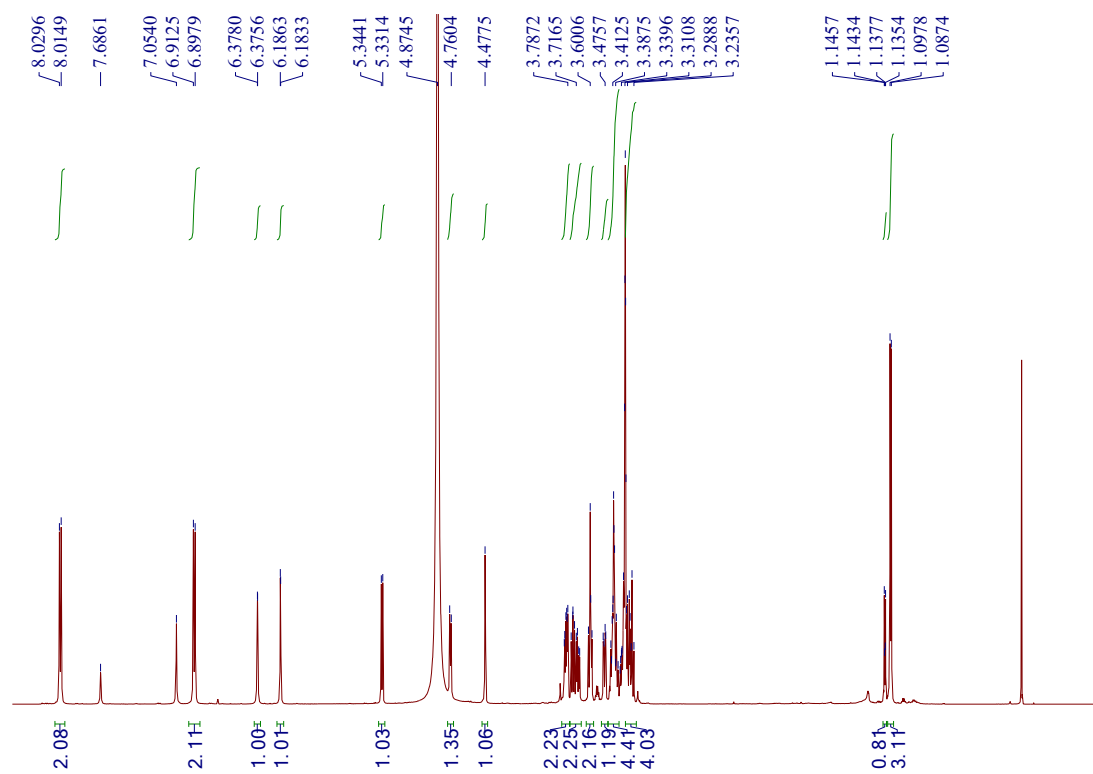

**Figure S3.**  $^1\text{H}$  NMR of compound **1**

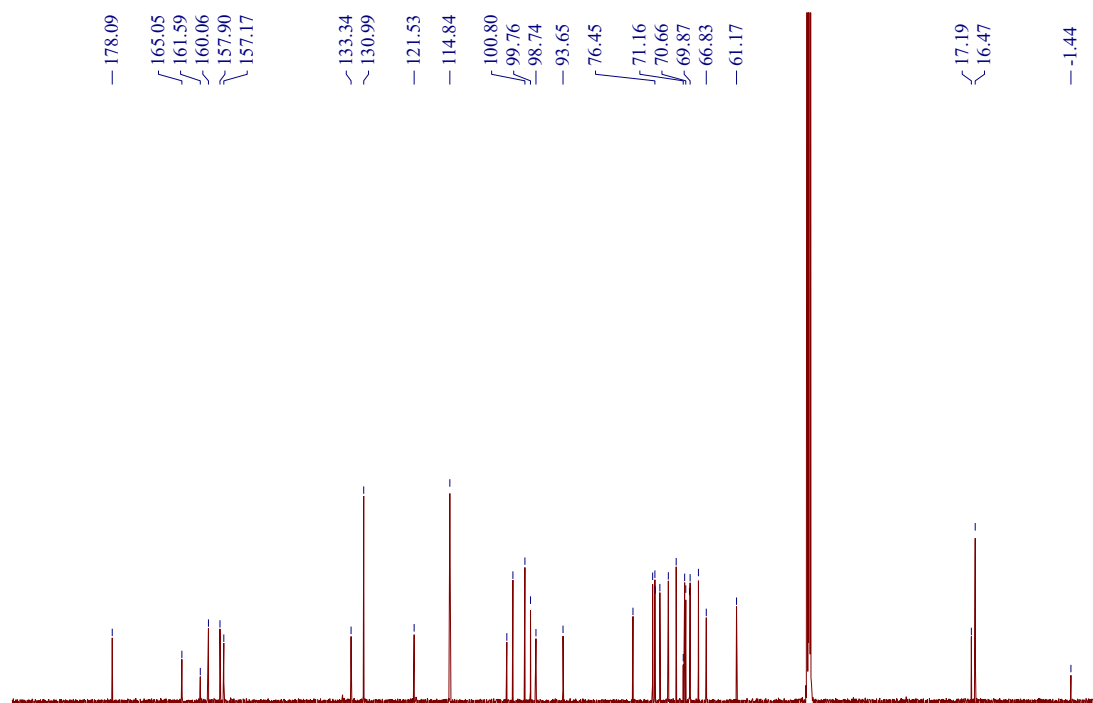

**Figure S4.**  $^{13}\text{C}$  NMR of compound **1**

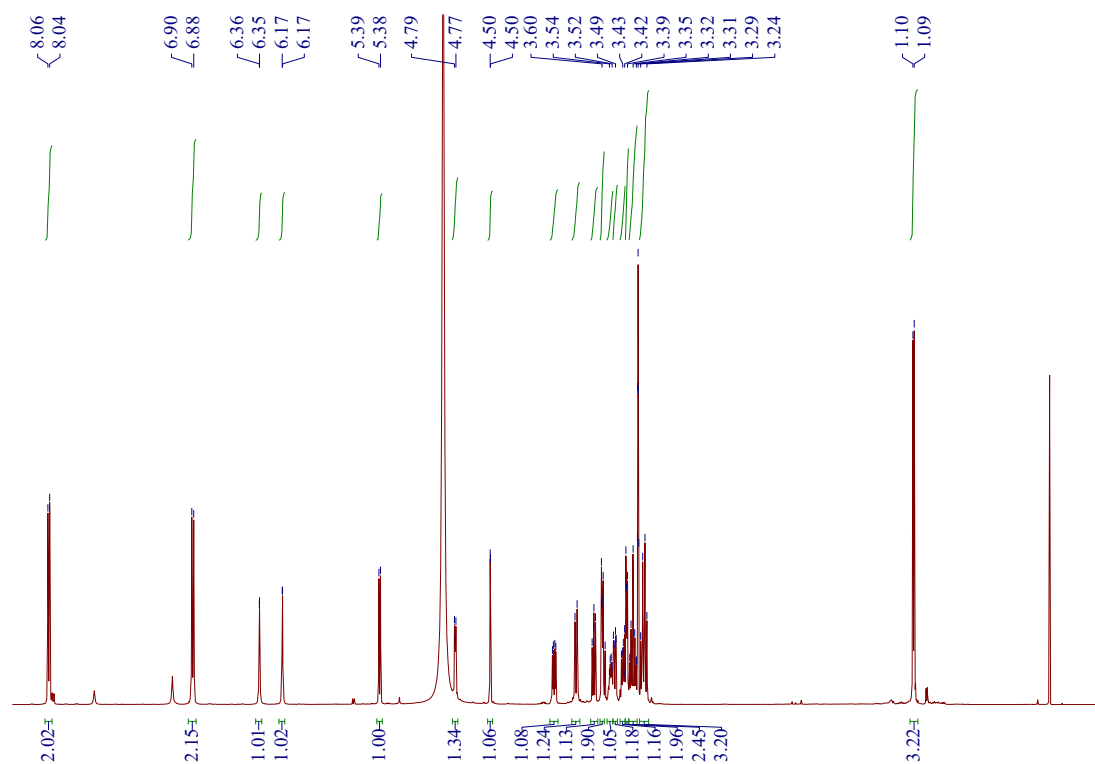

**Figure S5.** <sup>1</sup>H NMR of compound **3**

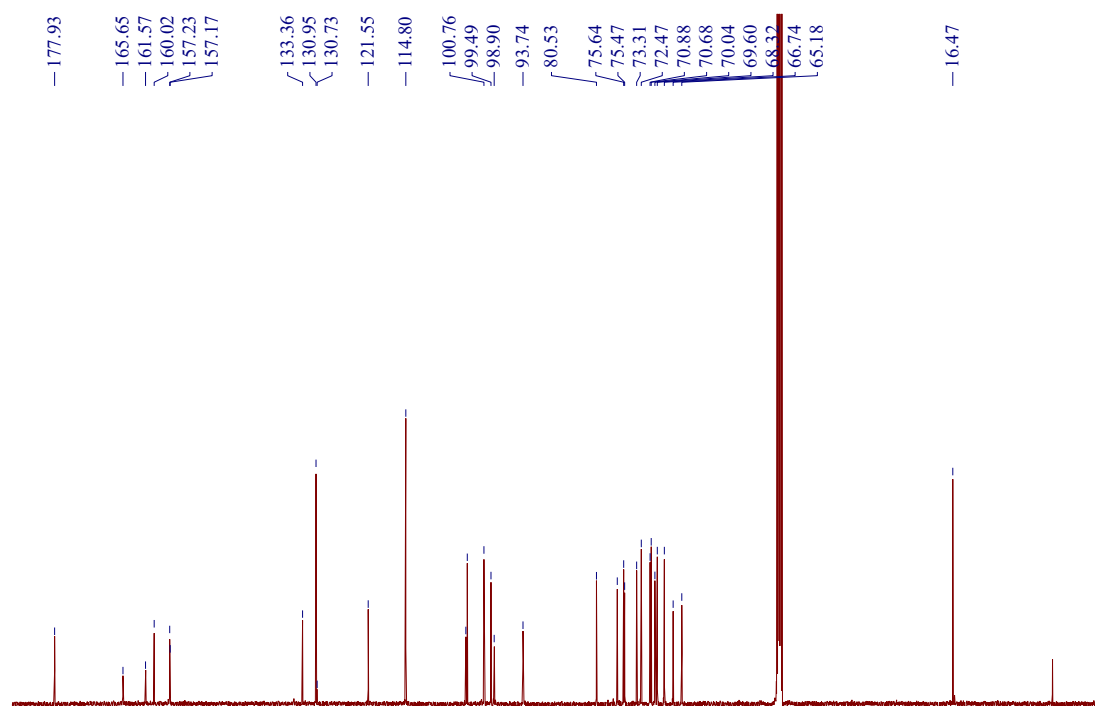

**Figure S6.** <sup>13</sup>C NMR of compound **3**
